# Supplementary material for: Robotic assisted gait as a tool for rehabilitation of individuals with spinal cord injury: a systematic review
Source: Springer Nature journal article supplement (doi:10.1186/s12984-017-0338-7), 2017-12-01
Supplement: MOESM1 [file 15277430]

Table 1. Description of the robotic device(s) used as a tool for rehabilitation of individuals with SCI.

| Robotic device (s)                                   | Features  |     |    |      |                        |                                               | Additional information available in the reviewed articles                                                                                                                                                                                                                                                                                                                                                                                                                                                                                                                                                                                                                                                                                                                                                                                                                                                                                                   |
|------------------------------------------------------|-----------|-----|----|------|------------------------|-----------------------------------------------|-------------------------------------------------------------------------------------------------------------------------------------------------------------------------------------------------------------------------------------------------------------------------------------------------------------------------------------------------------------------------------------------------------------------------------------------------------------------------------------------------------------------------------------------------------------------------------------------------------------------------------------------------------------------------------------------------------------------------------------------------------------------------------------------------------------------------------------------------------------------------------------------------------------------------------------------------------------|
|                                                      | Treadmill | BWS | GF | DOFs | Maximum patient weight | Requires torso and upper limb muscle strength |                                                                                                                                                                                                                                                                                                                                                                                                                                                                                                                                                                                                                                                                                                                                                                                                                                                                                                                                                             |
| ARGO (A) [9, 20].                                    | O         | O   | •  | •    | —                      | •                                             | <ul style="list-style-type: none"> <li>❖ Excessive energy expenditure due to the use of devices to assist gait such as crutches to help walk.</li> <li>❖ Gait pattern is not physiologic.</li> <li>❖ Allows hip flexion of a lower limb to the lower contralateral member through a reciprocal bond.</li> </ul>                                                                                                                                                                                                                                                                                                                                                                                                                                                                                                                                                                                                                                             |
| Brain-controlled robotic exoskeleton (EXO) (B) [11]. | O         | O   | •  | 12   | —                      | O                                             | <ul style="list-style-type: none"> <li>❖ Can be associated with BWS, sensory feedback, and pressure sensors, wire sensors, gyroscopes and EEG.</li> <li>❖ Designed to be anatomically coherent with the body of an individual, because hip-to-knee segments of the legs could be adjusted to accommodate a variety of different leg lengths.</li> </ul>                                                                                                                                                                                                                                                                                                                                                                                                                                                                                                                                                                                                     |
| EKSO (C) [22, 23, 26, 27].                           | O         | O   | •  | 4    | —                      | •                                             | <ul style="list-style-type: none"> <li>❖ Passive spring-loaded ankle joints.</li> <li>❖ Backpack that houses a computer.</li> <li>❖ Battery supply.</li> <li>❖ Wired controller.</li> <li>❖ Provides support from the posterior pelvis to the upper back.</li> <li>❖ A step will not be triggered unless crutches are firmly on the ground.</li> <li>❖ Do not present severe orthostatic hypotension, significant cardiac or vascular disease and integumentary issues such as open wounds.</li> <li>❖ No pregnancy.</li> <li>❖ Do not present significantly decline of bone density as indicated by DXA or a history of pathological fractures.</li> <li>❖ Patients which do not present bilateral upper-extremity strength, one functional upper extremity or one functional lower extremity.</li> <li>❖ Patients with contractures greater than 10 in the hip or knee joint, leg length differences more than 2 cm or total hip replacements.</li> </ul> |

|                                                                                                                                        |   |   |   |   |        |   |                                                                                                                                                                                                                                                                                                                                                                                                                                                                                                                                                                                                                                                                                                                                                                                                                                                                                                                                                                                                                                                                                    |
|----------------------------------------------------------------------------------------------------------------------------------------|---|---|---|---|--------|---|------------------------------------------------------------------------------------------------------------------------------------------------------------------------------------------------------------------------------------------------------------------------------------------------------------------------------------------------------------------------------------------------------------------------------------------------------------------------------------------------------------------------------------------------------------------------------------------------------------------------------------------------------------------------------------------------------------------------------------------------------------------------------------------------------------------------------------------------------------------------------------------------------------------------------------------------------------------------------------------------------------------------------------------------------------------------------------|
| HAL (D) [12, 25, 26].                                                                                                                  | O | O | • | — | —      | • | <ul style="list-style-type: none"> <li>❖ Excessive energy expenditure due to a need for gait assistance devices such as crutches to help walk.</li> <li>❖ Present a frame and robotic actuators that attach to the patient's legs.</li> <li>❖ Joint movement is supported by electric motors.</li> <li>❖ Initiate by minimal bioelectrical signals detected via surface EMG electrodes measured in hip and knee extensor and flexor muscles.</li> <li>❖ Can be associated to treadmill and BWS.</li> </ul>                                                                                                                                                                                                                                                                                                                                                                                                                                                                                                                                                                         |
| Indego (E) [28, 31].                                                                                                                   | O | O | • | — | 113 kg | • | <ul style="list-style-type: none"> <li>❖ Enables to help sitting, walking, and standing as well as sit-to-stand, stand-to-walk, walk-to-stand, and stand-to-sit transitions or sit with 100% powered robotic assistance.</li> <li>❖ Developed based on the user's ability to affect its center of pressure via the use of the upper body in combination with a stability aid.</li> <li>❖ Excessive energy expenditure due to a need for gait assistance devices such as crutches to help walk.</li> <li>❖ Height range 155 – 191 cm.</li> <li>❖ Maximum hip width 42.2 cm.</li> <li>❖ Femur length range 35 – 47 cm.</li> <li>❖ Spasticity score: Modified Ashworth score 3 or lower.</li> <li>❖ It is necessary sufficient upper body strength to balance and supports the forearms crutches, front-wheeled walker or platform walker.</li> <li>❖ For complete and incomplete spinal cord injured individuals T4 or below.</li> <li>❖ A Bluetooth LE radio allows communication between the Indego and iPhone or iPod touch through the custom Indego iOS application.</li> </ul> |
| Lokomat FreeD Module (F) [19].                                                                                                         | • | • | • | 6 | 135 kg | O | <ul style="list-style-type: none"> <li>❖ Patients can activate their core muscles and experience balance aspects.</li> <li>❖ Video monitor up front.</li> <li>❖ Allows lateral translation and transverse rotation of the pelvis.</li> </ul>                                                                                                                                                                                                                                                                                                                                                                                                                                                                                                                                                                                                                                                                                                                                                                                                                                       |
| LokomatPRO (without FreeD module) (G) [7, 10, 13, 29, 30, 32, 33, 34, 35, 36, 37, 38, 39, 40, 41, 42, 43, 44, 45, 46, 47, 48, 49, 50]. | • | • | • | 4 | 135 kg | O | <ul style="list-style-type: none"> <li>❖ Gait pattern is physiologic.</li> <li>❖ Compatible with pediatric orthoses.</li> <li>❖ Video monitor up front.</li> <li>❖ Used to measure isometric force (torque), the stiffness of the patient's joints while the legs are passively moved at 30, 60 and 90°/s, and PROM.</li> </ul>                                                                                                                                                                                                                                                                                                                                                                                                                                                                                                                                                                                                                                                                                                                                                    |

|                          |   |   |   |   |        |   |                                                                                                                                                                                                                                                                                                                                                                                                                                                                                                                                                                                                                                                                                                                                                                                                       |
|--------------------------|---|---|---|---|--------|---|-------------------------------------------------------------------------------------------------------------------------------------------------------------------------------------------------------------------------------------------------------------------------------------------------------------------------------------------------------------------------------------------------------------------------------------------------------------------------------------------------------------------------------------------------------------------------------------------------------------------------------------------------------------------------------------------------------------------------------------------------------------------------------------------------------|
| LOPES (H) [16, 17].      | • | • | • | 6 | —      | ○ | <ul style="list-style-type: none"> <li>❖ Passive foot lifters can be added to keep dorsiflexion ankle.</li> <li>❖ Video monitor up front.</li> <li>❖ Severe contractures.</li> <li>❖ Bone instability.</li> <li>❖ Open skin lesions in the area of the lower limbs and torso.</li> <li>❖ Cardiac and circulatory contraindications</li> <li>❖ Severe cognitive deficits.</li> <li>❖ Hip, knee, ankle arthrodesis.</li> </ul>                                                                                                                                                                                                                                                                                                                                                                          |
| Mindwalker (I) [15, 18]. | ○ | ○ | • | 6 | 100 kg | • | <ul style="list-style-type: none"> <li>❖ Excessive energy expenditure due to a need for gait assistance devices such as crutches.</li> <li>❖ Patient height between 1.53 - 1.88 m.</li> <li>❖ Hip width up to 0.44 m.</li> <li>❖ Requires high load on the upper limb joints.</li> <li>❖ Can be associated to treadmill and BWS.</li> <li>❖ Initiate by minimal bioelectrical signals detected via surface EMG electrodes measured in hip and knee extensor and flexor muscles.</li> </ul>                                                                                                                                                                                                                                                                                                            |
| ReWalk (J) [21, 23, 26]. | ○ | ○ | • | — | 100 kg | • | <ul style="list-style-type: none"> <li>❖ Body height between 160 - 190 cm.</li> <li>❖ Gait pattern is not physiological.</li> <li>❖ Due to standing up/sitting down with the crutches, the device exerts pressure at the bend of the elbow and present risk of bruises.</li> <li>❖ Requires walking aids (crutches or a walker) to ensure stability and safety of the user.</li> <li>❖ The gait is a three-point pattern.</li> <li>❖ Present a battery unit, computer contained in a backpack, wireless mode selector, sensors that measure upper-body tilt angle, joint angles, and ground contact.</li> <li>❖ The exoskeleton is articulated to footplates distally and to a sacral band proximally.</li> <li>❖ Additional modes include sit-to-stand, stand-to-sit, up and down stairs.</li> </ul> |

WPAL (K) [24].

O

O

•

6

136 kg

•

❖ The user will partially depend on crutches, or a walker to support their weight and maintain balance, joint angles and foot contact forces, which are often recorded to monitor basic gait performance.

❖ Exoskeleton and walker are placed at a convenient location suitable for walking (e.g. bedroom).

❖ Other robotic parts can be added by the user in the wheelchair.

❖ Robot can be folded into a roller bag and transported to anywhere.

❖ It can be used on uneven surfaces.

---

(•) Yes; (O) Not; (—) Not informed.
